# Supplementary material for: Anti-microbial effect of filtered 222nm excimer lamps in a hospital waiting area
Source: Research Square preprint supplement (doi:10.21203/rs.3.rs-1411913/v1), 2022-03-18
Supplement: Supplementary file 1 [file 39ef0ed6c5dbcc85095e73ce.pdf]

Table 1

| Species                                  | No UV                      | UV222                      |
|------------------------------------------|----------------------------|----------------------------|
| <i>Acinetobacter lwoffii</i>             | <i>Detected</i>            | <i>Detected</i>            |
| <b><i>Actionocoralia libanotica</i></b>  | <b><i>Not detected</i></b> | <b><i>Detected</i></b>     |
| <b><i>Bacillus cereus</i></b>            | <b><i>Detected</i></b>     | <b><i>Not Detected</i></b> |
| <b><i>Bacillus licheniformis</i></b>     | <b><i>Detected</i></b>     | <b><i>Not detected</i></b> |
| <i>Bacillus muralis</i>                  | <i>Detected</i>            | <i>Detected</i>            |
| <i>Bacillus pumilus</i>                  | <i>Detected</i>            | <i>Detected</i>            |
| <b><i>Bacillus simplex</i></b>           | <b><i>Not detected</i></b> | <b><i>Detected</i></b>     |
| <i>Bacillus subtilis</i>                 | <i>Detected</i>            | <i>Detected</i>            |
| <b><i>Brevibacillus parabrevis</i></b>   | <b><i>Detected</i></b>     | <b><i>Not detected</i></b> |
| <b><i>Lactobacillus plantanum</i></b>    | <b><i>Detected</i></b>     | <b><i>Not detected</i></b> |
| <b><i>Micrococcus luteus</i></b>         | <b><i>Detected</i></b>     | <b><i>Not detected</i></b> |
| <b><i>Moraxella atlantae</i></b>         | <b><i>Detected</i></b>     | <b><i>Not detected</i></b> |
| <i>Moraxella osloensis</i>               | <i>Detected</i>            | <i>Detected</i>            |
| <b><i>Staphylococcus aureus</i></b>      | <b><i>Detected</i></b>     | <b><i>Not detected</i></b> |
| <b><i>Staphylococcus capitis</i></b>     | <b><i>Detected</i></b>     | <b><i>Not detected</i></b> |
| <b><i>Staphylococcus epidermidis</i></b> | <b><i>Detected</i></b>     | <b><i>Not detected</i></b> |
| <i>Staphylococcus haemolyticus</i>       | <i>Detected</i>            | <i>Detected</i>            |
| <i>Staphylococcus hominis</i>            | <i>Detected</i>            | <i>Detected</i>            |
| <b><i>Staphylococcus warneri</i></b>     | <b><i>Detected</i></b>     | <b><i>Not detected</i></b> |
| <b><i>Staphylococcus pasteurii</i></b>   | <b><i>Not detected</i></b> | <b><i>Detected</i></b>     |

Table 1: List of identified bacterial species on chairs without UV and with UV. Bacteria names in **bold** denotes species only found in one of the conditions. Genotyping was performed on samples from 6 different chairs either with or without UV222. Genotyping was done on samples from 5 different days.
